# Supplementary material for: Cytogenetic Abnormalities for Predicting the Risk of Metastases in Choroidal and Ciliary Body Melanoma
Source: PubMed Central journal article supplement — Invest Ophthalmol Vis Sci. 2023 Jan 19;64(1):15. doi: 10.1167/iovs.64.1.15 (PMC9872839; doi:10.1167/iovs.64.1.15), 2023-01-19
Supplement: iovs-64-1-15_s001.pdf [file iovs-64-1-15_s001.pdf]

## Supplementary Materials. Description of the SALSA MLPA probes

([www.mrcholland.com](http://www.mrcholland.com))

| Length (nt) | SALSA MLPA probe                                                               | Chromosomal position (hg18) <sup>a</sup> |         |         |         |       |
|-------------|--------------------------------------------------------------------------------|------------------------------------------|---------|---------|---------|-------|
|             |                                                                                | Reference                                | Chr 1   | Chr 3   | Chr 6   | Chr 8 |
| 64-105      | Control fragments – see table in probemix content section for more information |                                          |         |         |         |       |
| 124 ¥       | Reference probe 21547-L02274                                                   | 18q11                                    |         |         |         |       |
| 130 ¥       | Reference probe 18709-L24593                                                   | 5q31                                     |         |         |         |       |
| 136         | <b>NOTCH2 probe</b> 02867-L02334                                               |                                          | 1p12    |         |         |       |
| 141 Δ       | <b>MLH1 probe</b> 15288-L20037                                                 |                                          |         | 3p22.2  |         |       |
| 148         | Reference probe 04445-L03831                                                   | 4q13                                     |         |         |         |       |
| 154 ¥       | <b>MYC probe</b> 20780-L27349                                                  |                                          |         |         | 8q24.21 |       |
| 160 « ¥     | <b>RUNX2 probe</b> 22020-L31270                                                |                                          |         | 6p12.3  |         |       |
| 166         | <b>MYC probe</b> 15894-L16789                                                  |                                          |         |         | 8q24.21 |       |
| 172 *       | Reference probe 09255-L31288                                                   | 7q22                                     |         |         |         |       |
| 178 ±       | <b>FHIT probe</b> 02292-L02212                                                 |                                          |         | 3p14.2  |         |       |
| 184         | <b>RP1 probe</b> 16641-L19172                                                  |                                          |         |         | 8q12.1  |       |
| 190         | <b>MIR128-2 probe</b> 15896-L17989                                             |                                          |         | 3p22.3  |         |       |
| 196         | <b>MFN2 probe</b> 04888-L04272                                                 |                                          | 1p36.22 |         |         |       |
| 202         | <b>MME probe</b> 00487-L00069                                                  |                                          |         | 3q25.31 |         |       |
| 207         | <b>CHL1 probe</b> 14147-L17987                                                 |                                          |         | 3p26.3  |         |       |
| 211 *       | Reference probe 05281-L31289                                                   | 14q22                                    |         |         |         |       |
| 220         | <b>GJB3 probe</b> 13671-L17892                                                 |                                          | 1p34.3  |         |         |       |
| 226         | <b>BAP1 probe</b> 16643-L20039                                                 |                                          |         | 3p21.1  |         |       |
| 233         | <b>IGF2R probe</b> 02798-L20038                                                |                                          |         |         | 6q25.3  |       |
| 240 ¥       | <b>RPE65 probe</b> 21549-L31285                                                |                                          | 1p31.3  |         |         |       |
| 247         | <b>CASR probe</b> 05708-L19175                                                 |                                          |         | 3q21.1  |         |       |
| 255 *       | Reference probe 13573-L31290                                                   | 19p13                                    |         |         |         |       |
| 260         | <b>PPARG probe</b> 06900-L06480                                                |                                          |         | 3p25.2  |         |       |
| 266 +       | <b>CCN2 probe</b> 04745-L19276                                                 |                                          |         |         | 6q23.2  |       |
| 275 « ¥     | <b>NBL1 probe</b> 04148-L31286                                                 |                                          | 1p36.13 |         |         |       |
| 283         | <b>BRK1 probe</b> 15895-L18089                                                 |                                          |         | 3p25.3  |         |       |
| 292         | Reference probe 08936-L09031                                                   | 11p15                                    |         |         |         |       |
| 299         | <b>ASAP1 probe</b> 16241-L18499                                                |                                          |         |         | 8q24.21 |       |
| 310         | <b>LZTS1 probe</b> 02552-L19178                                                |                                          |         |         | 8p21.3  |       |
| 318         | <b>NRG1 probe</b> 04239-L03575                                                 |                                          |         |         | 8p12    |       |
| 328         | <b>PROS1 probe</b> 05297-L04685                                                |                                          |         | 3q11.2  |         |       |
| 337         | <b>FHIT probe</b> 02290-L01781                                                 |                                          |         | 3p14.2  |         |       |
| 346         | <b>OPA1 probe</b> 03271-L02708                                                 |                                          |         | 3q29    |         |       |
| 355         | <b>PTAFR probe</b> 02267-L01425                                                |                                          | 1p35.3  |         |         |       |
| 364         | <b>RBM5 probe</b> 15897-L18094                                                 |                                          |         | 3p21.31 |         |       |
| 373         | Reference probe 09779-L10194                                                   | 15q15                                    |         |         |         |       |
| 383         | <b>ECI2 probe</b> 10252-L11363                                                 |                                          |         |         | 6p25.2  |       |
| 391         | <b>VHL probe</b> 13322-L14735                                                  |                                          |         | 3p25.3  |         |       |
| 400         | Reference probe 14423-L16128                                                   | 12q21                                    |         |         |         |       |
| 409 ¥       | <b>ROBO1 probe</b> 21548-L31318                                                |                                          |         | 3p12.3  |         |       |
| 418         | <b>MUTYH probe</b> 03964-L03351                                                |                                          | 1p34.1  |         |         |       |
| 427         | <b>CDKN1A probe</b> 00585-L18090                                               |                                          |         |         | 6p21.31 |       |
| 436         | Reference probe 12790-L19277                                                   | 2q13                                     |         |         |         |       |
| 445         | <b>VHL probe</b> 15899-L18091                                                  |                                          |         | 3p25.3  |         |       |
| 454         | <b>CTNNB1 probe</b> 16407-L18832                                               |                                          |         | 3p22.1  |         |       |
| 463         | <b>DCDC2 probe</b> 10253-L18092                                                |                                          |         |         | 6p22.2  |       |
| 474         | <b>XPC probe</b> 06118-L05573                                                  |                                          |         | 3p25.1  |         |       |
| 483         | <b>BAP1 probe</b> 16644-L19176                                                 |                                          |         | 3p21.1  |         |       |
| 490         | Reference probe 14909-L17745                                                   | 18p11                                    |         |         |         |       |
| 504 ¥       | Reference probe 09870-L19465                                                   | 2p15                                     |         |         |         |       |

| Length (nt) | Name                                                       |
|-------------|------------------------------------------------------------|
| 64-70-76-82 | Q-fragments (only visible with <100 ng sample DNA)         |
| 88-96       | D-fragments (low signal indicates incomplete denaturation) |
| 92          | Benchmark fragment                                         |
| 100         | X-fragment (X chromosome specific)                         |
| 105         | Y-fragment (Y chromosome specific)                         |
